# Supplementary material for: Machine learning analyses of antibody somatic mutations predict immunoglobulin light chain toxicity
Source: PubMed Central journal article supplement (PMC8192768; doi:10.1038/s41467-021-23880-9), 2021-06-10
Supplement: 41467_2021_23880_MOESM1_ESM.pdf [file 41467_2021_23880_MOESM1_ESM.pdf]

## SUPPLEMENTARY FIGURES

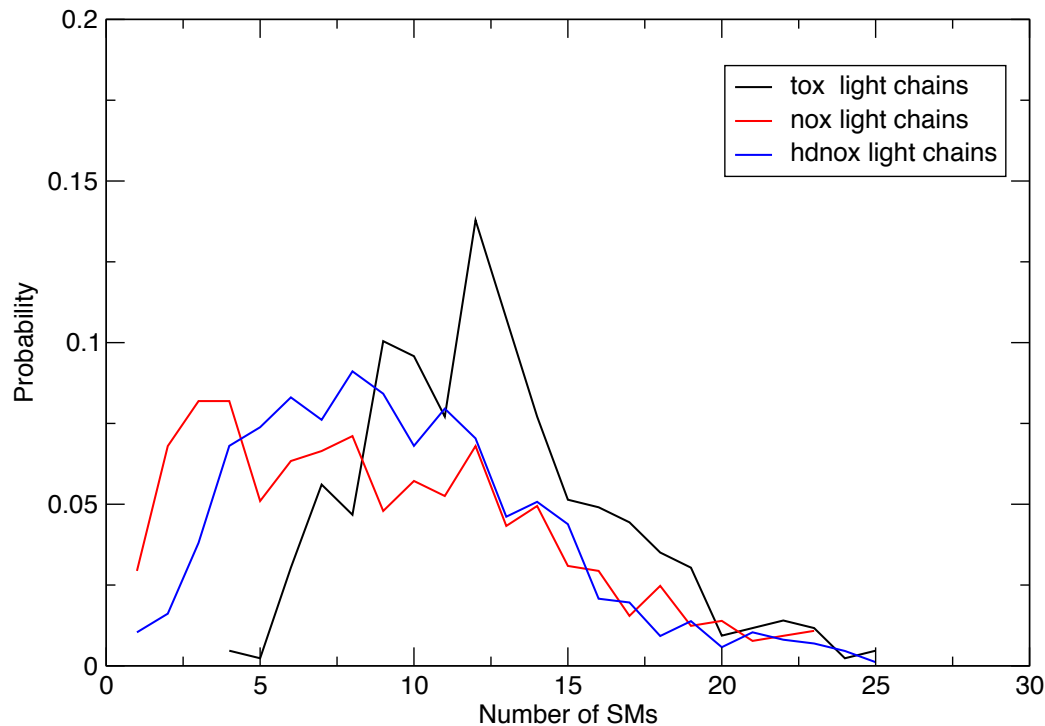

**Supplementary Figure. 1 | Probability distribution of somatic mutations in toxic and non-toxic light chain sequences.** The black line represent the probability distributions of somatic mutations (PDSM) in toxic light chains (tox) (average number of mutations equal to 12.5), the red line represent the PDSM of non-toxic sequences (nox) used in the training of the machine learning algorithm (average number of mutations equal to 8.8), while the blue line represent the PDSM computed randomly selecting 1000 lambda LCs from a healthy donor<sup>1</sup> (hdnox) (average number of mutations equal to 9.6). The difference in average number of somatic mutations in the two set of non-toxic LC sequences is not statistically significant ( $p = 0.1$ ), while there is a statistically significant difference between the toxic sequences and both non-toxic dataset ( $p < 10e-29$ ). Statistical analysis were performed using Student  $t$  test.

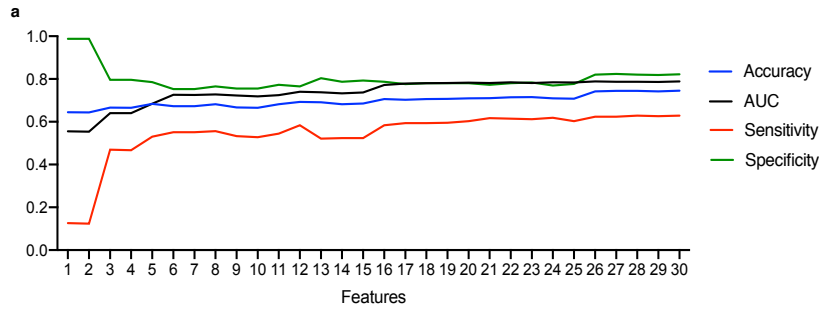

**b**

| Features |                                                                                                                                                                                                                   |
|----------|-------------------------------------------------------------------------------------------------------------------------------------------------------------------------------------------------------------------|
| 1        | 49A                                                                                                                                                                                                               |
| 2        | 49A.I49AX116I                                                                                                                                                                                                     |
| 3        | 49A.I49AX116I.I65XX107I                                                                                                                                                                                           |
| 4        | 49A.I49AX116I.I65XX107I.I4XA49I                                                                                                                                                                                   |
| 5        | 49A.I49AX116I.I65XX107I.I4XA49I.I49XX99I                                                                                                                                                                          |
| 6        | 49A.I49AX116I.I65XX107I.I4XA49I.I49XX99I.I52XX108I                                                                                                                                                                |
| 7        | 49A.I49AX116I.I65XX107I.I4XA49I.I49XX99I.I52XX108I.I49AX99I                                                                                                                                                       |
| 8        | 49A.I49AX116I.I65XX107I.I4XA49I.I49XX99I.I52XX108I.I49AX99I.107X                                                                                                                                                  |
| 9        | 49A.I49AX116I.I65XX107I.I4XA49I.I49XX99I.I52XX108I.I49AX99I.107X.104XX108                                                                                                                                         |
| 10       | 49A.I49AX116I.I65XX107I.I4XA49I.I49XX99I.I52XX108I.I49AX99I.107X.104XX108.I3XA49I                                                                                                                                 |
| 11       | 49A.I49AX116I.I65XX107I.I4XA49I.I49XX99I.I52XX108I.I49AX99I.107X.104XX108.I3XA49I.106X                                                                                                                            |
| 12       | 49A.I49AX116I.I65XX107I.I4XA49I.I49XX99I.I52XX108I.I49AX99I.107X.104XX108.I3XA49I.106X.44XX98                                                                                                                     |
| 13       | 49A.I49AX116I.I65XX107I.I4XA49I.I49XX99I.I52XX108I.I49AX99I.107X.104XX108.I3XA49I.106X.44XX98.52XX65                                                                                                              |
| 14       | 49A.I49AX116I.I65XX107I.I4XA49I.I49XX99I.I52XX108I.I49AX99I.107X.104XX108.I3XA49I.106X.44XX98.52XX65.44XX99                                                                                                       |
| 15       | 49A.I49AX116I.I65XX107I.I4XA49I.I49XX99I.I52XX108I.I49AX99I.107X.104XX108.I3XA49I.106X.44XX98.52XX65.44XX99.I66XX107I                                                                                             |
| 16       | 49A.I49AX116I.I65XX107I.I4XA49I.I49XX99I.I52XX108I.I49AX99I.107X.104XX108.I3XA49I.106X.44XX98.52XX65.44XX99.I66XX107I.54XX58                                                                                      |
| 17       | 49A.I49AX116I.I65XX107I.I4XA49I.I49XX99I.I52XX108I.I49AX99I.107X.104XX108.I3XA49I.106X.44XX98.52XX65.44XX99.I66XX107I.54XX58.1XH108                                                                               |
| 18       | 49A.I49AX116I.I65XX107I.I4XA49I.I49XX99I.I52XX108I.I49AX99I.107X.104XX108.I3XA49I.106X.44XX98.52XX65.44XX99.I66XX107I.54XX58.1XH108.I49XX116I                                                                     |
| 19       | 49A.I49AX116I.I65XX107I.I4XA49I.I49XX99I.I52XX108I.I49AX99I.107X.104XX108.I3XA49I.106X.44XX98.52XX65.44XX99.I66XX107I.54XX58.1XH108.I49XX116I.108H                                                                |
| 20       | 49A.I49AX116I.I65XX107I.I4XA49I.I49XX99I.I52XX108I.I49AX99I.107X.104XX108.I3XA49I.106X.44XX98.52XX65.44XX99.I66XX107I.54XX58.1XH108.I49XX116I.108H.44HX96                                                         |
| 21       | 49A.I49AX116I.I65XX107I.I4XA49I.I49XX99I.I52XX108I.I49AX99I.107X.104XX108.I3XA49I.106X.44XX98.52XX65.44XX99.I66XX107I.54XX58.1XH108.I49XX116I.108H.44HX96.44XX97                                                  |
| 22       | 49A.I49AX116I.I65XX107I.I4XA49I.I49XX99I.I52XX108I.I49AX99I.107X.104XX108.I3XA49I.106X.44XX98.52XX65.44XX99.I66XX107I.54XX58.1XH108.I49XX116I.108H.44HX96.44XX97.78X                                              |
| 23       | 49A.I49AX116I.I65XX107I.I4XA49I.I49XX99I.I52XX108I.I49AX99I.107X.104XX108.I3XA49I.106X.44XX98.52XX65.44XX99.I66XX107I.54XX58.1XH108.I49XX116I.108H.44HX96.44XX97.78X.I52XX116I                                    |
| 24       | 49A.I49AX116I.I65XX107I.I4XA49I.I49XX99I.I52XX108I.I49AX99I.107X.104XX108.I3XA49I.106X.44XX98.52XX65.44XX99.I66XX107I.54XX58.1XH108.I49XX116I.108H.44HX96.44XX97.78X.I52XX116I.106N                               |
| 25       | 49A.I49AX116I.I65XX107I.I4XA49I.I49XX99I.I52XX108I.I49AX99I.107X.104XX108.I3XA49I.106X.44XX98.52XX65.44XX99.I66XX107I.54XX58.1XH108.I49XX116I.108H.44HX96.44XX97.78X.I52XX116I.106N.42XX52                        |
| 26       | 49A.I49AX116I.I65XX107I.I4XA49I.I49XX99I.I52XX108I.I49AX99I.107X.104XX108.I3XA49I.106X.44XX98.52XX65.44XX99.I66XX107I.54XX58.1XH108.I49XX116I.108H.44HX96.44XX97.78X.I52XX116I.106N.42XX52.56XX59                 |
| 27       | 49A.I49AX116I.I65XX107I.I4XA49I.I49XX99I.I52XX108I.I49AX99I.107X.104XX108.I3XA49I.106X.44XX98.52XX65.44XX99.I66XX107I.54XX58.1XH108.I49XX116I.108H.44HX96.44XX97.78X.I52XX116I.106N.42XX52.56XX59.49X             |
| 28       | 49A.I49AX116I.I65XX107I.I4XA49I.I49XX99I.I52XX108I.I49AX99I.107X.104XX108.I3XA49I.106X.44XX98.52XX65.44XX99.I66XX107I.54XX58.1XH108.I49XX116I.108H.44HX96.44XX97.78X.I52XX116I.106N.42XX52.56XX59.49X.44X         |
| 29       | 49A.I49AX116I.I65XX107I.I4XA49I.I49XX99I.I52XX108I.I49AX99I.107X.104XX108.I3XA49I.106X.44XX98.52XX65.44XX99.I66XX107I.54XX58.1XH108.I49XX116I.108H.44HX96.44XX97.78X.I52XX116I.106N.42XX52.56XX59.49X.44X.52X     |
| 30       | 49A.I49AX116I.I65XX107I.I4XA49I.I49XX99I.I52XX108I.I49AX99I.107X.104XX108.I3XA49I.106X.44XX98.52XX65.44XX99.I66XX107I.54XX58.1XH108.I49XX116I.108H.44HX96.44XX97.78X.I52XX116I.106N.42XX52.56XX59.49X.44X.52X.44H |

**Supplementary Figure. 2 | Quantitative analysis of the importance of features identified by the feature selection technique training 30 different classifiers with a 10-fold cross validation, adding one by one the 10 most important features of each feature family according to information gain.** **a**, the contribution of each feature in the achieved AUC, Accuracy, Sensitivity and Specificity, and **b**, the specific features added. The results of these analysis are reported in Supplementary Table 9.

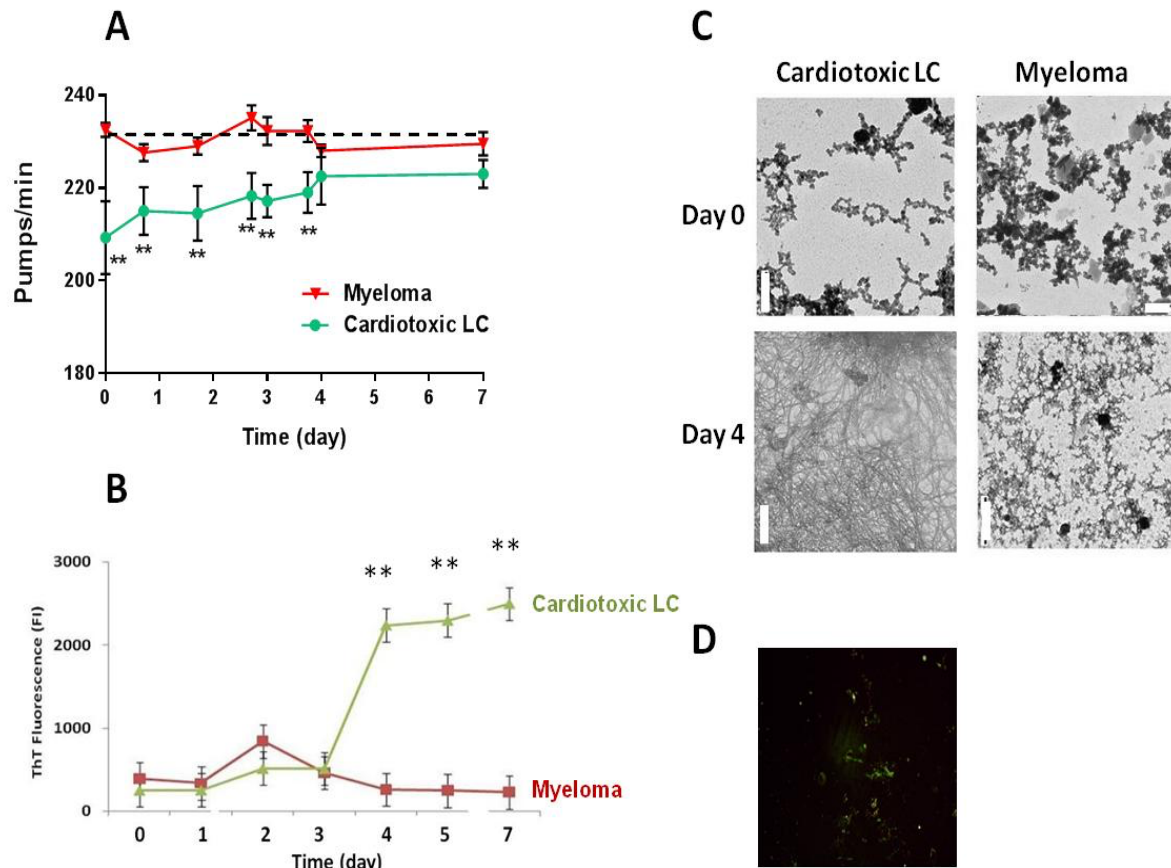

**Supplementary Figure 3** | Amyloidogenic cardiotoxic LC and nonamyloidogenic myeloma LC (Myeloma) were suspended at 20  $\mu$ M in 10 mM sodium acetate, boric acid, and sodium citrate buffer containing 150 mM NaCl, pH 2.0, and incubated at 67°C. Buffer alone (vehicle) was incubated as control. **(A)** The toxicity of LCs was determined before and different times after incubation by administering them to N2 *C. elegans* (100 worms/100  $\mu$ l) at 100  $\mu$ g/ml for 2 h. Control worms fed vehicle alone. The pharyngeal pumping rate was scored 24 h after the administration. \*\*  $p < 0.001$  vs vehicle (dotted line) and myeloma according to one-way Anova and Bonferroni's *post hoc* test. **(B)** Fibrillogenesis was monitored before and different times after incubation by determining the fluorescence intensity of ThT. \*\*  $p < 0.001$  vs myeloma at the same time point, Student's t-test. **(C)** TEM analysis was performed before (Day 0) and 4 days after incubation (Day 4) by negatively stained samples with 2% uranyl acetate. Scale bar=0.2  $\mu$ m. **(D)** Cardiotoxic LC incubated for 4 days were stained with Congo Red and observed at a polarized microscopy.

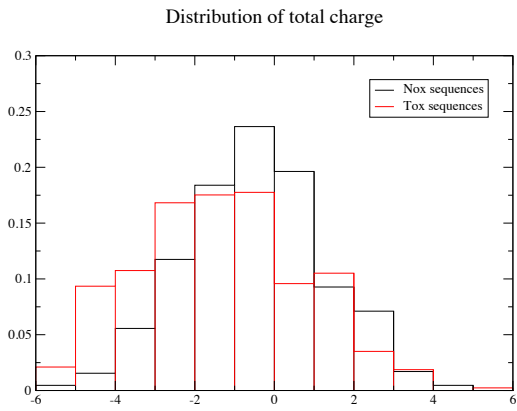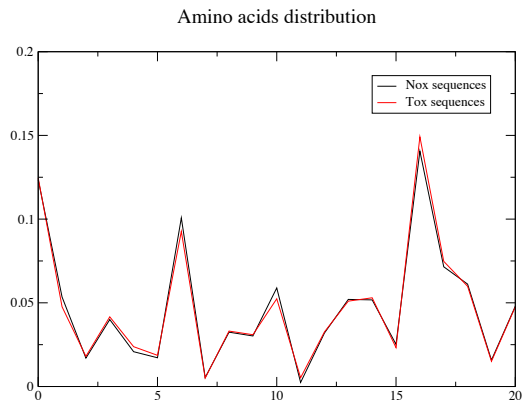

**Supplementary Figure 4** | Comparison of charge and amino acids distributions in *nox* and *tox* sequences.

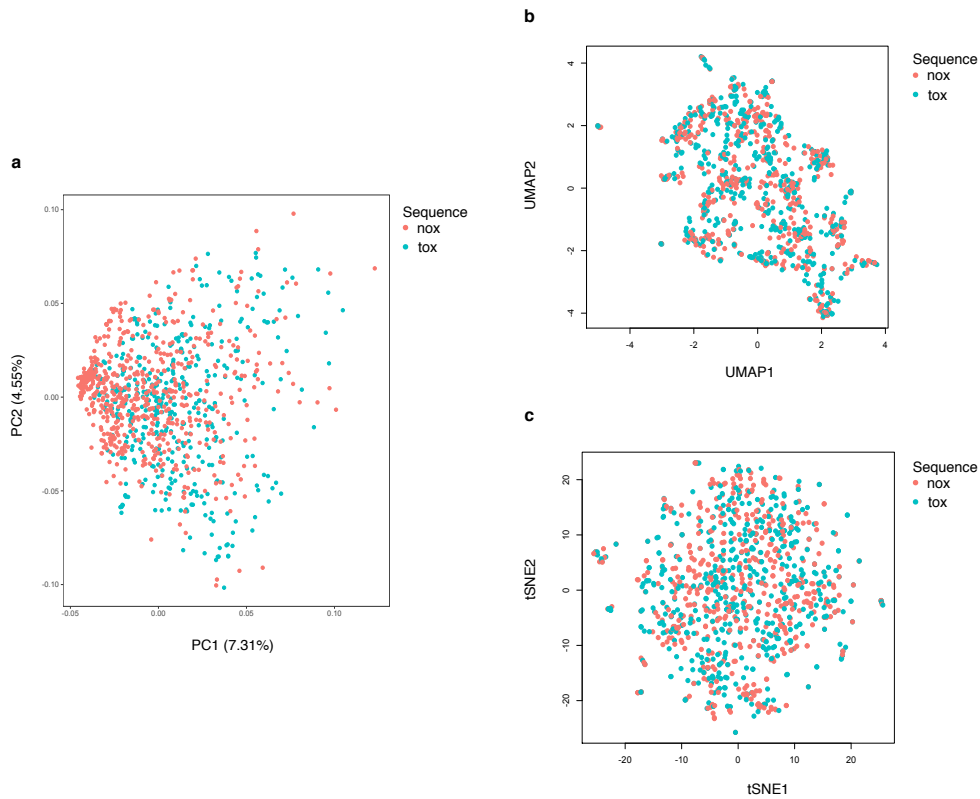

**Supplementary Figure 5 | a**, Principal component analysis (PCA) on *tox* and *nox* sequences expressed as binary vectors of dimension 125x21, where for each amino acid we used a one-hot encoding vector of dimension 21 (20 amino acids and possible insertions). **b**, t-SNE and **c**, UMAP analyses.
